# Supplementary material for: Comparative transcriptome analysis of embryonic and adult stem cells with extended and limited differentiation capacity
Source: Springer Nature journal article supplement (doi:10.1186/gb-2007-8-8-r163), 2007-08-06

## Supplementary Figures

**Supplementary Figure 1. PCA of MSC, MSC-like (MSC-1, mClone-3), MAPC-1 (M-1), MAPC-2 (M-2) and ESC on reported ESC and MSC hypoxia upregulated genes.**

- A. PCA on 44 genes reported to be upregulated in ESC under short-term acute hypoxia [52] with samples plotted in the first two components space
- B. PCA on 135 genes reported to be upregulated in MSC under short-term acute hypoxia [53] with samples plotted in the first two components space

**Supplementary Figure 2. PCA and NMF analysis on ESC and MSC hypoxia upregulated genes of MSC, MSC-like (MSC-1, mClone-3), MAPC-1 (M-1), MAPC-2 (M-2) and ESC on genes correlated or anticorrelated to Pdgfra.**

- A. PCA on all differentially expressed genes minus 146 Pdgfra correlated or anticorrelated genes with samples plotted in the first two components space
- B. Consensus matrix from NMF on all differentially expressed genes minus 146 Pdgfra correlated or anticorrelated genes

**Supplementary Figure 3. Correlation of fold difference on common differentially expressed genes between mMAPCs vs MSCs and rMAPC-1 vs rClone-2.**

# Supplementary Figure 1

A

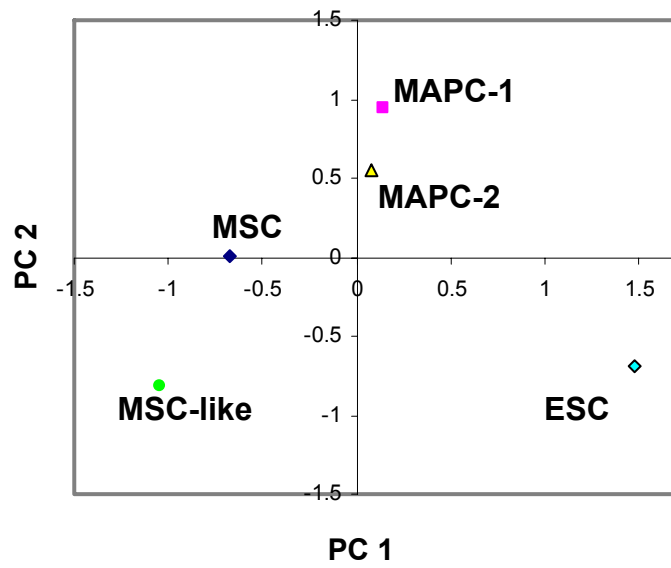

B

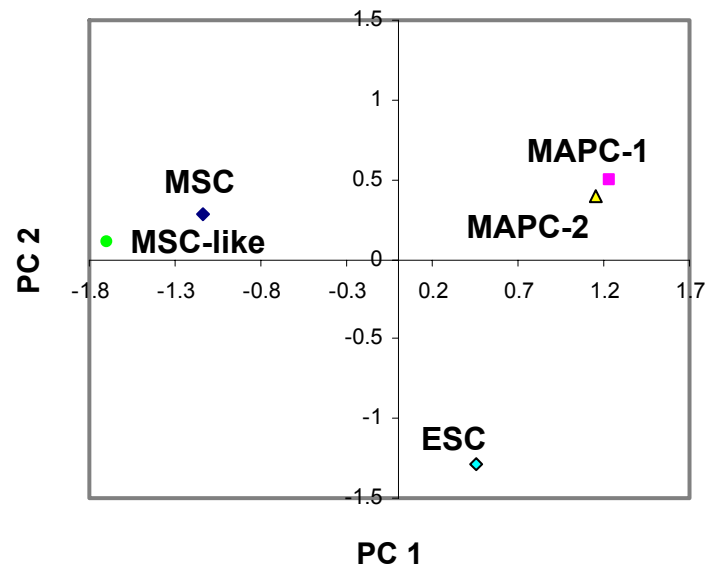

# Supplementary Figure 2

A

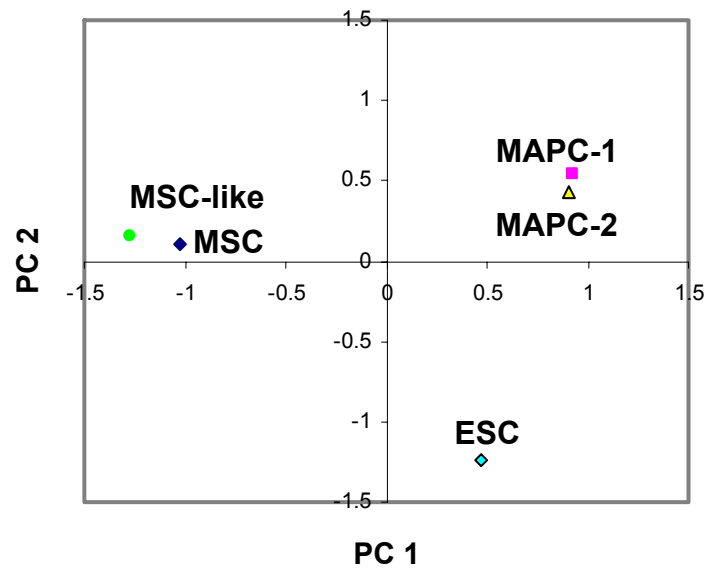

B

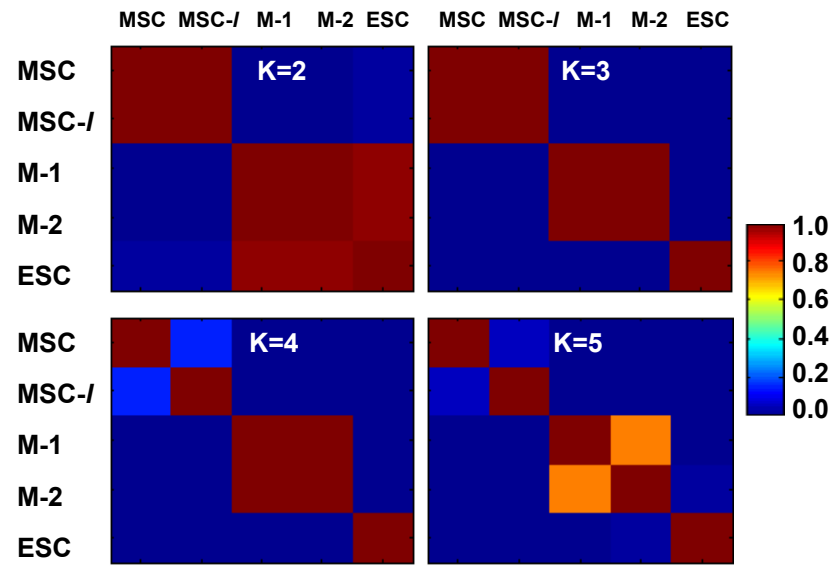

Supplementary Figure 3

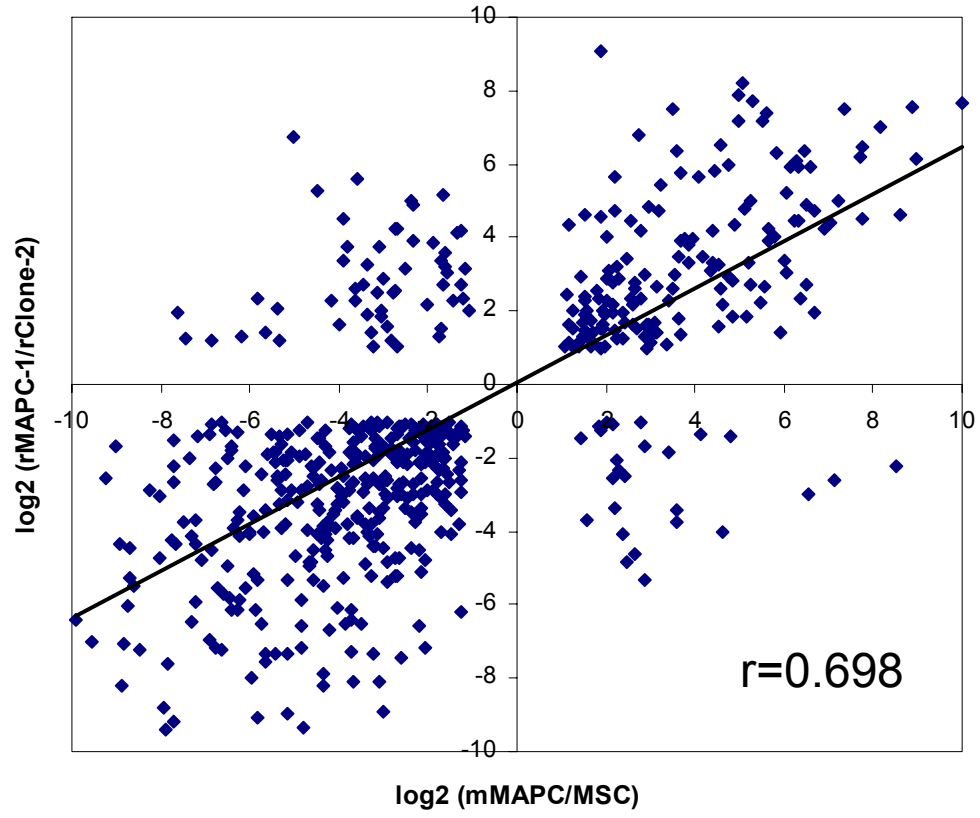

Supplement: Additional file 2 [file gb-2007-8-8-r163-s2.pdf]
